# Supplementary material for: A thermoresponsive polymer supporter for concerted catalysis of ferrocene with a ruthenium catalyst in living radical polymerization: high activity and efficient removal of metal residues
Source: Royal Society of Chemistry journal article supplement (doi:10.1039/c5py01063b), 2015-01-01
Supplement: c5py01063b1.pdf [file c5py01063b1.pdf]

# Thermoresponsive Polymer Supporter for Concerted Catalysis of Ferrocene with Ruthenium Catalyst in Living Radical Polymerization: High Activity and Efficient Removal of Metal Residues

*Kojiro Fujimura, Makoto Ouchi,\* and Mitsuo Sawamoto\**

Department of Polymer Chemistry, Graduate School of Engineering, Kyoto University, Katsura,

Nishikyo-ku, Kyoto 615-8510, Japan

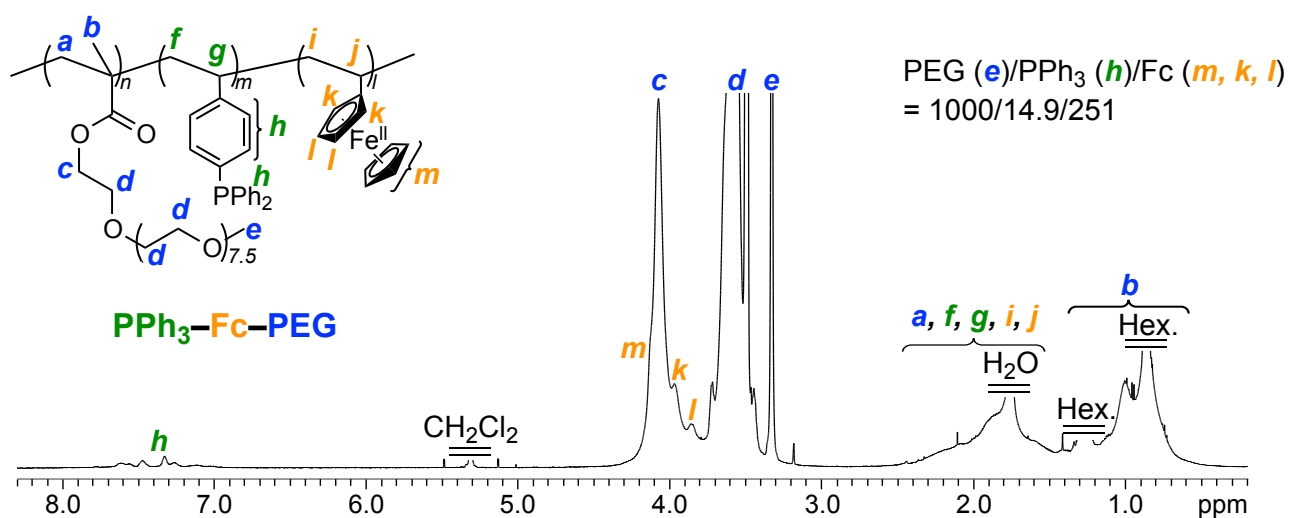

**Figure S1.**  $^1\text{H}$  NMR spectrum of  $\text{PPh}_3\text{-Fc-PEG}$  in  $\text{CD}_2\text{Cl}_2$  at room temperature.

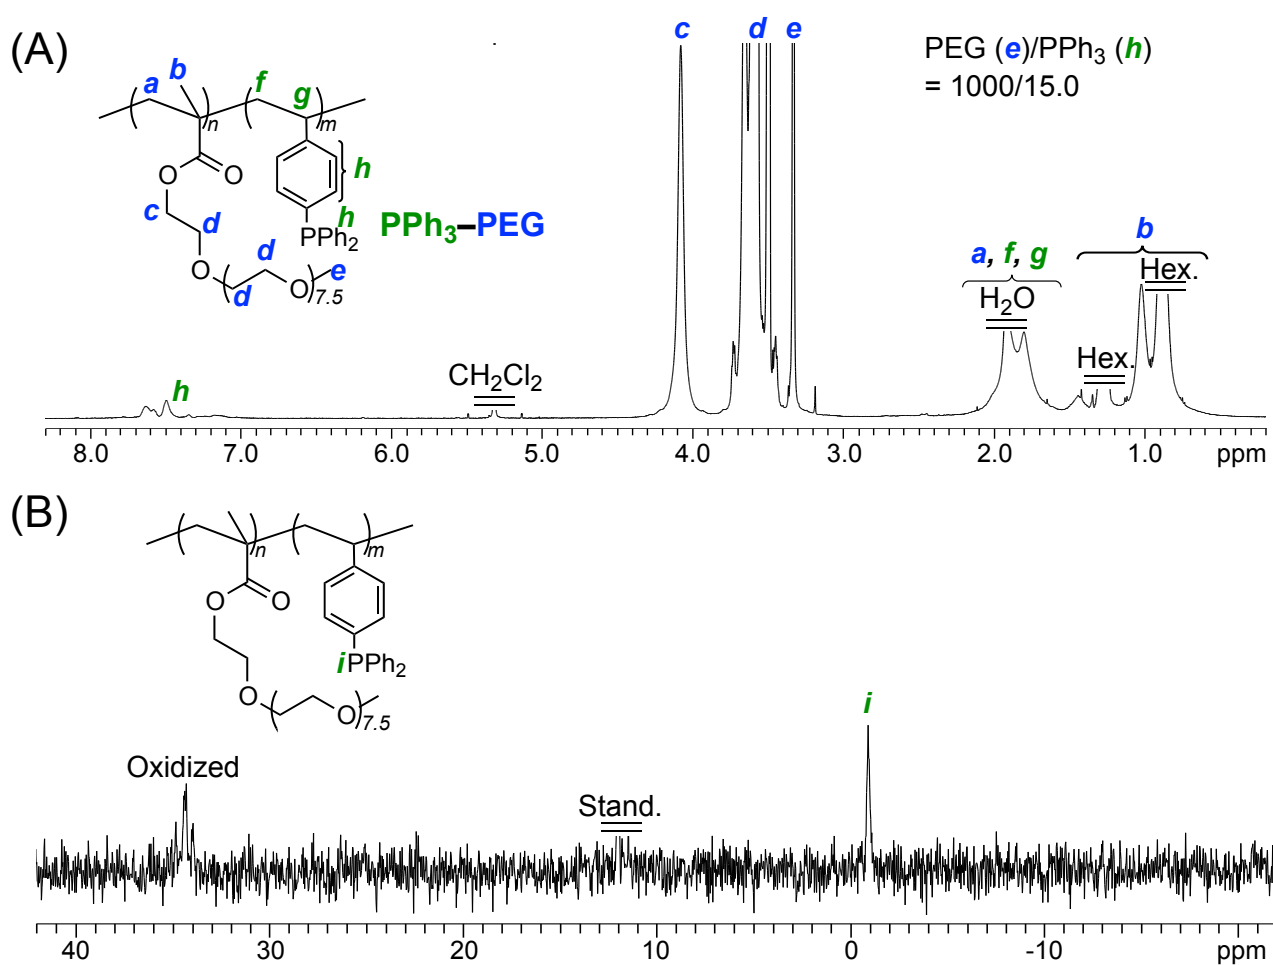

**Figure S2.** (A)  $^1\text{H}$  (in  $\text{CD}_2\text{Cl}_2$ ), and (B)  $^{31}\text{P}$  NMR (in  $\text{CDCl}_3$ ) spectrum of  $\text{PPh}_3\text{-PEG}$  at room temperature.

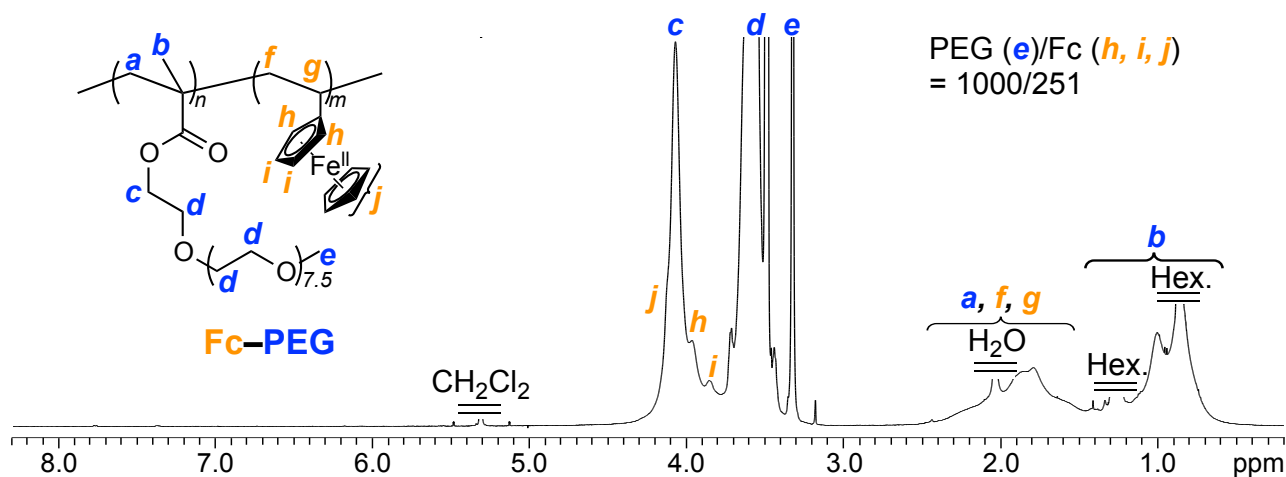

**Figure S3.**  $^1\text{H}$  NMR spectrum of Fc-PEG in  $\text{CD}_2\text{Cl}_2$  at room temperature.

**(A)  $\text{Ru}(\text{Cp}^*)\text{Cl}(\text{PPh}_3)_2$**

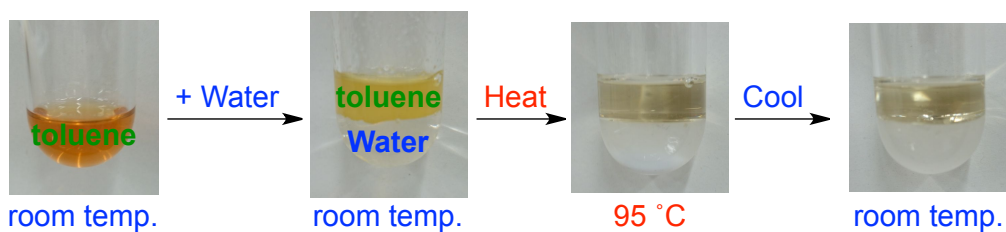

**(B)  $\text{FeCp}_2$**

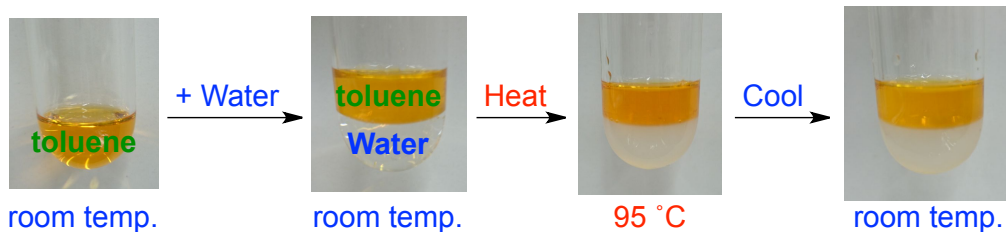

**Figure S4.** Solubility of  $\text{Ru}(\text{Cp}^*)\text{Cl}(\text{PPh}_3)_2$  (A) and  $\text{FeCp}_2$  (B) in a toluene/water biphasic solution:  $[\text{Ru}(\text{Cp}^*)\text{Cl}(\text{PPh}_3)_2]_0 = 1.0 \text{ mM}$ ;  $[\text{FeCp}_2]_0 = 40 \text{ mM}$ .

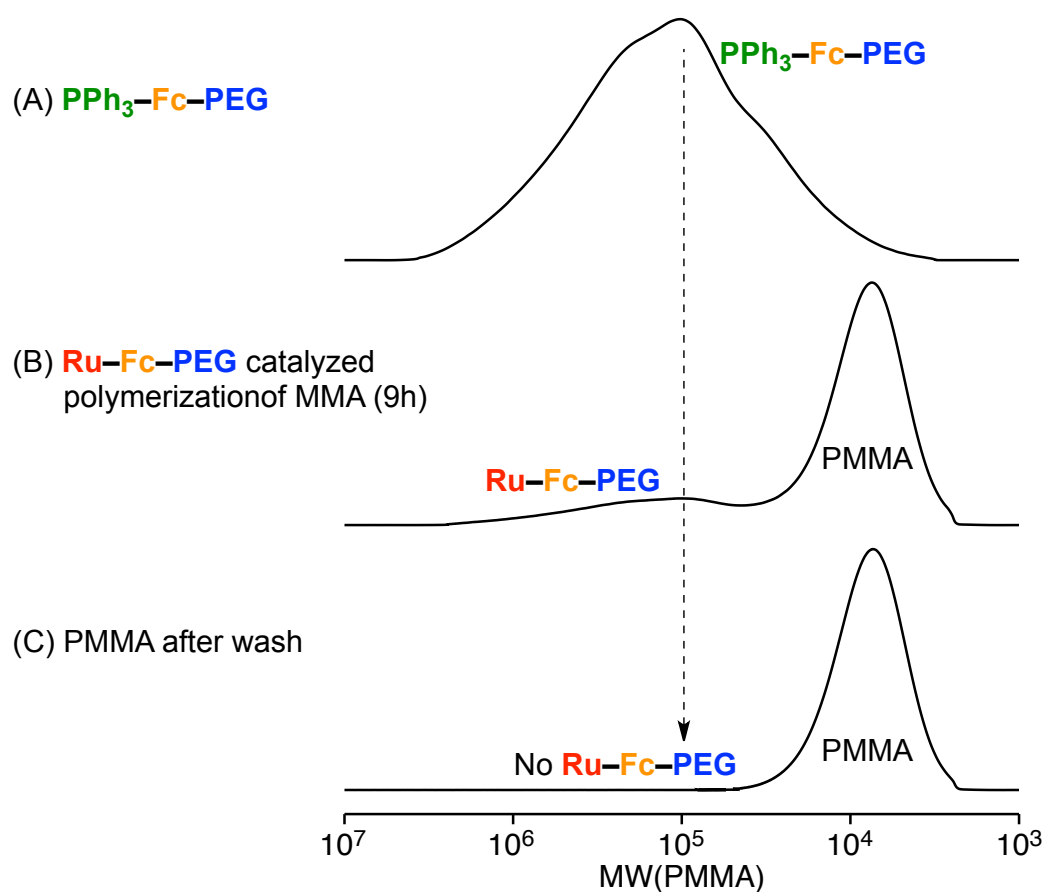

**Figure S5.** Removal of Ru-Fc-PEG polymer catalyst from obtained PMMA by washing with water: SEC curves of  $PPh_3$ -Fc-PEG (A), the solution of Ru-Fc-PEG catalyzed polymerization of MMA for 9h (see Figure 4A, entry 2 in the main text; B), and the obtained PMMA after washing with water (C).

$$\text{Removability of Ru (Ru}_{\text{remov}}) = 1 - \frac{\text{Residual Ru from ICP-AES}}{\text{Weight of the initially added Ru in 1g of PMMA (Ru}_{\text{init}})}$$

$$\text{Removability of Fe (Fe}_{\text{remov}}) = 1 - \frac{\text{Residual Fe from ICP-AES}}{\text{Weight of the initially added Fe in 1g of PMMA (Fe}_{\text{init}})}$$

$$\left( \begin{array}{l} \text{Ru}_{\text{init}} = \frac{(\text{Atomic weight of the Ru, g/mol}) \times (\text{Ru feed on polymerization, mM})}{(\text{Molecular weight of MMA, g/mol}) \times (\text{MMA feed on polymerization, mM}) \times \text{Conv.}} \\ \text{Fe}_{\text{init}} = \frac{(\text{Atomic weight of the Fe, g/mol}) \times (\text{Fe feed on polymerization, mM})}{(\text{Molecular weight of MMA, g/mol}) \times (\text{MMA feed on polymerization, mM}) \times \text{Conv.}} \end{array} \right)$$

ex) PMMA obtained with **Ru-Fc-PEG** (Conv. = 92%;  $M_n = 10700$ ;  $M_w/M_n = 1.17$ ; see Figure 5A in the main text)

$$\text{Ru}_{\text{init}} = \frac{(101.07 \text{ g/mol}) \times (0.25 \times 4 \text{ mM})}{(100.12 \text{ g/mol}) \times (4000 \text{ mM}) \times 0.92} = 2.72 \times 10^{-3} \quad \text{Fe}_{\text{init}} = \frac{(55.845 \text{ g/mol}) \times (40 \text{ mM})}{(100.12 \text{ g/mol}) \times (4000 \text{ mM}) \times 0.92} = 6.06 \times 10^{-3}$$

$$\text{Ru}_{\text{remov}} = 1 - \frac{5.7 \times 10^{-6}}{2.72 \times 10^{-3}} = 0.998 \text{ (99.8\%)} \quad \text{Fe}_{\text{remov}} = 1 - \frac{89 \times 10^{-6}}{6.06 \times 10^{-3}} = 0.985 \text{ (98.5\%)}$$

**Figure S6.** The calculation methods for the removability of Ru ( $\text{Ru}_{\text{remov}}$ ) and Fe ( $\text{Fe}_{\text{remov}}$ ) in PMMA after washing with water (see Figure 5 in the main text).
